# Supplementary material
Source: MDPI journal article supplement (https://www.mdpi.com/2073-8994/15/1/212)
Supplement: s1 [file s1]

### *X-ray crystal structure determination*

The single-crystal X-ray diffraction data for **2**, **6** and **7** were collected on a three-circle Bruker D8 Venture diffractometer ( $T = 100$  K, graphite monochromator,  $\omega$  and  $\varphi$  scanning mode). The data were indexed and integrated using the *SAINT* program [1], and then scaled and corrected for absorption using the *SADABS* program [2]. The single-crystal X-ray diffraction data for **8-11** were collected on a four-circle Rigaku Synergy S diffractometer equipped with a HyPix6000HE area-detector ( $T = 100$  K, graphite monochromator, shutterless  $\omega$ -scan mode). The data were integrated and corrected for absorption by the *CrysAlisPro* program [3]. For details, see Table S1.

The structures were determined by direct methods and refined by full-matrix least squares technique on  $F^2$  with anisotropic displacement parameters for non-hydrogen atoms. In the crystal of **9**, a solvate acetonitrile molecule was revealed. All attempts to model and refine position of the solvate molecule were unsuccessful. Therefore, its contribution to the total scattering pattern was removed by use of the utility SQUEEZE in PLATON06 [4]. The hydrogen atoms were placed in calculated positions and refined within riding model with fixed isotropic displacement parameters [ $U_{\text{iso}}(\text{H}) = 1.5U_{\text{eq}}(\text{O})$ ,  $1.5U_{\text{eq}}(\text{C})$  for the  $\text{CH}_3$ -groups and  $1.2U_{\text{eq}}(\text{C})$  for the other groups]. All calculations were carried out using the SHELXTL program [5].

Crystallographic data for all investigated compounds have been deposited with the Cambridge Crystallographic Data Center, CCDC 2224565 (**2** •  $\text{H}_2\text{O}$ ), CCDC 2224566 (**6**), CCDC 2224567 (**7**), CCDC 2224568 (**8**), CCDC 2224569 (**9**), CCDC 2224570 (**10**) and CCDC 2224571 (**11**). Copies of this information may be obtained free of charge from the Director, CCDC, 12 Union Road, Cambridge CB2 1EZ, UK (Fax: +44 1223 336033; e-mail: deposit@ccdc.cam.ac.uk or www.ccdc.cam.ac.uk).

### References

- [1] Bruker, *SAINT*, v. 8.40A, Bruker AXS Inc., Madison, WI, **2019**.
- [2] L. Krause, R. Herbst-Irmer, G. M. Sheldrick, D. Stalke, *J. Appl. Cryst.* **2015**, 48, 3-10.
- [3] Rigaku, *CrysAlisPro Software System*, v. 1.171.41.106a, Rigaku Oxford Diffraction, **2021**.
- [4] A. L. Spek, *PLATON*, A Multipurpose Crystallographic Tool, Utrecht University, the Netherlands, **2015**.
- [5] G. M. Sheldrick, *Acta Cryst.* **2015**, C71, 3-8.

**Table S1.** Crystal data and structure refinement for all compounds studied.

| Identification code                                                          | <b>2 • H<sub>2</sub>O</b>                                          | <b>6</b>                                                            | <b>7</b>                                                            | <b>8</b>                                                            |
|------------------------------------------------------------------------------|--------------------------------------------------------------------|---------------------------------------------------------------------|---------------------------------------------------------------------|---------------------------------------------------------------------|
| Empirical formula                                                            | C <sub>9</sub> H <sub>11</sub> ClN <sub>2</sub> OSe                | C <sub>33</sub> H <sub>31</sub> BN <sub>2</sub> Se                  | C <sub>33</sub> H <sub>29</sub> BN <sub>2</sub> Se                  | C <sub>37</sub> H <sub>31</sub> BN <sub>2</sub> Se                  |
| Formula weight                                                               | 277.61                                                             | 545.37                                                              | 543.35                                                              | 593.41                                                              |
| Crystal size, mm                                                             | 0.07×0.20×0.20                                                     | 0.02×0.15×0.70                                                      | 0.10×0.15×0.20                                                      | 0.03×0.21×0.23                                                      |
| Radiation, Å                                                                 | 0.71073                                                            | 0.71073                                                             | 0.71073                                                             | 1.54184                                                             |
| Crystal system                                                               | Triclinic                                                          | Monoclinic                                                          | Triclinic                                                           | Orthorhombic                                                        |
| Space group                                                                  | <i>P</i> -1                                                        | <i>P</i> 2 <sub>1</sub> /n                                          | <i>P</i> -1                                                         | <i>Pbca</i>                                                         |
| <i>a</i> , Å                                                                 | 7.210(10)                                                          | 8.848(14)                                                           | 16.275(4)                                                           | 12.98660(13)                                                        |
| <i>b</i> , Å                                                                 | 7.496(8)                                                           | 15.274(13)                                                          | 20.021(4)                                                           | 13.29822(14)                                                        |
| <i>c</i> , Å                                                                 | 11.071(18)                                                         | 20.76(2)                                                            | 20.459(4)                                                           | 34.5956(4)                                                          |
| $\alpha$ , deg.                                                              | 71.93(4)                                                           | 90                                                                  | 119.240(7)                                                          | 90                                                                  |
| $\beta$ , deg.                                                               | 72.88(5)                                                           | 99.30(6)                                                            | 100.623(9)                                                          | 90                                                                  |
| $\gamma$ , deg.                                                              | 62.68(3)                                                           | 90                                                                  | 99.813(10)                                                          | 90                                                                  |
| <i>V</i> , Å <sup>3</sup>                                                    | 497.2(12)                                                          | 2769(6)                                                             | 5447(2)                                                             | 5974.61(11)                                                         |
| <i>Z</i>                                                                     | 2                                                                  | 4                                                                   | 8                                                                   | 8                                                                   |
| Density (calc.), Mg/m <sup>3</sup>                                           | 1.854                                                              | 1.308                                                               | 1.325                                                               | 1.319                                                               |
| $\mu$ , mm <sup>-1</sup>                                                     | 4.011                                                              | 1.380                                                               | 1.403                                                               | 1.906                                                               |
| <i>F</i> (000)                                                               | 276                                                                | 1128                                                                | 2240                                                                | 2448                                                                |
| Theta range, deg.                                                            | 1.97 – 30.21                                                       | 1.99 – 26.00                                                        | 1.34 – 25.00                                                        | 2.55 – 77.78                                                        |
| Index ranges                                                                 | -8 ≤ <i>h</i> ≤ 10,<br>-10 ≤ <i>k</i> ≤ 10,<br>-15 ≤ <i>l</i> ≤ 15 | -10 ≤ <i>h</i> ≤ 10,<br>-18 ≤ <i>k</i> ≤ 16,<br>-25 ≤ <i>l</i> ≤ 24 | -19 ≤ <i>h</i> ≤ 19,<br>-23 ≤ <i>k</i> ≤ 21,<br>-24 ≤ <i>l</i> ≤ 24 | -14 ≤ <i>h</i> ≤ 16,<br>-16 ≤ <i>k</i> ≤ 16,<br>-43 ≤ <i>l</i> ≤ 43 |
| Reflections collected                                                        | 4832                                                               | 13123                                                               | 39999                                                               | 48130                                                               |
| Independent reflections, <i>R</i> <sub>int</sub>                             | 2842, 0.0275                                                       | 5408, 0.0507                                                        | 18949, 0.0418                                                       | 6307, 0.0436                                                        |
| Reflections observed                                                         | 2419                                                               | 3932                                                                | 14979                                                               | 5557                                                                |
| <i>R</i> <sub>1</sub> / w <i>R</i> <sub>2</sub> ( <i>I</i> > 2σ( <i>I</i> )) | 0.0363 / 0.0859                                                    | 0.0542 / 0.1217                                                     | 0.0875 / 0.2322                                                     | 0.0446 / 0.1191                                                     |
| <i>R</i> <sub>1</sub> / w <i>R</i> <sub>2</sub> (all data)                   | 0.0482 / 0.0910                                                    | 0.0844 / 0.1333                                                     | 0.1047 / 0.2403                                                     | 0.0507 / 0.1236                                                     |
| Goodness-of-fit on <i>F</i> <sup>2</sup>                                     | 1.023                                                              | 1.063                                                               | 1.089                                                               | 1.059                                                               |
| Extinction coefficient                                                       | —                                                                  | —                                                                   | —                                                                   | 0.00011(1)                                                          |
| <i>T</i> <sub>min</sub> / <i>T</i> <sub>max</sub>                            | 0.504 / 0.746                                                      | 0.529 / 0.747                                                       | 0.632 / 0.746                                                       | 0.506 / 0.939                                                       |
| Δρ <sub>max</sub> / Δρ <sub>min</sub> , eÅ <sup>-3</sup>                     | 0.678 / -0.911                                                     | 1.730 / -0.459                                                      | 2.317 / -0.832                                                      | 0.917 / -0.586                                                      |

**Table S1 (continued).** Crystal data and structure refinement for all compounds studied.

| Identification code                                                          | <b>9</b>                                                            | <b>10 • ½CH<sub>3</sub>CN</b>                                       | <b>11</b>                                                           |
|------------------------------------------------------------------------------|---------------------------------------------------------------------|---------------------------------------------------------------------|---------------------------------------------------------------------|
| Empirical formula                                                            | C <sub>41</sub> H <sub>33</sub> BN <sub>2</sub> Se                  | C <sub>37</sub> H <sub>29</sub> BCl <sub>2</sub> N <sub>2</sub> Se  | C <sub>9</sub> H <sub>9</sub> AuCl <sub>4</sub> N <sub>2</sub> Se   |
| Formula weight                                                               | 643.46                                                              | 662.29                                                              | 562.91                                                              |
| Crystal size, mm                                                             | 0.11×0.15×0.18                                                      | 0.02×0.13×0.21                                                      | 0.21×0.32×0.40                                                      |
| Radiation, Å                                                                 | 1.54184                                                             | 0.71073                                                             | 0.71073                                                             |
| Crystal system                                                               | Monoclinic                                                          | Monoclinic                                                          | Monoclinic                                                          |
| Space group                                                                  | <i>P</i> 2 <sub>1</sub> / <i>c</i>                                  | <i>C</i> 2/ <i>c</i>                                                | <i>P</i> 2 <sub>1</sub> / <i>c</i>                                  |
| <i>a</i> , Å                                                                 | 13.25147(14)                                                        | 27.692(4)                                                           | 7.20317(16)                                                         |
| <i>b</i> , Å                                                                 | 36.6506(5)                                                          | 18.571(2)                                                           | 11.5792(2)                                                          |
| <i>c</i> , Å                                                                 | 13.08859(16)                                                        | 24.418(3)                                                           | 16.7793(4)                                                          |
| $\alpha$ , deg.                                                              | 90                                                                  | 90                                                                  | 90                                                                  |
| $\beta$ , deg.                                                               | 91.0491(11)                                                         | 98.230(4)                                                           | 95.7281(19)                                                         |
| $\gamma$ , deg.                                                              | 90                                                                  | 90                                                                  | 90                                                                  |
| <i>V</i> , Å <sup>3</sup>                                                    | 6355.73(13)                                                         | 12428(3)                                                            | 1392.52(5)                                                          |
| <i>Z</i>                                                                     | 8                                                                   | 16                                                                  | 4                                                                   |
| Density (calc.), Mg/m <sup>3</sup>                                           | 1.345                                                               | 1.416                                                               | 2.685                                                               |
| $\mu$ , mm <sup>-1</sup>                                                     | 1.837                                                               | 1.410                                                               | 13.923                                                              |
| <i>F</i> (000)                                                               | 2656                                                                | 5408                                                                | 1032                                                                |
| Theta range, deg.                                                            | 2.41 – 83.11                                                        | 2.19 – 27.00                                                        | 2.14 – 31.72                                                        |
| Index ranges                                                                 | -15 ≤ <i>h</i> ≤ 16,<br>-46 ≤ <i>k</i> ≤ 46,<br>-16 ≤ <i>l</i> ≤ 16 | -35 ≤ <i>h</i> ≤ 35,<br>-23 ≤ <i>k</i> ≤ 23,<br>-31 ≤ <i>l</i> ≤ 31 | -10 ≤ <i>h</i> ≤ 10,<br>-15 ≤ <i>k</i> ≤ 16,<br>-23 ≤ <i>l</i> ≤ 22 |
| Reflections collected                                                        | 214248                                                              | 92586                                                               | 28880                                                               |
| Independent reflections, <i>R</i> <sub>int</sub>                             | 13562, 0.1024                                                       | 13373, 0.0993                                                       | 4120, 0.0873                                                        |
| Reflections observed                                                         | 12320                                                               | 7152                                                                | 3707                                                                |
| <i>R</i> <sub>1</sub> / w <i>R</i> <sub>2</sub> ( <i>I</i> > 2σ( <i>I</i> )) | 0.0986 / 0.2227                                                     | 0.0835 / 0.1661                                                     | 0.0331 / 0.0801                                                     |
| <i>R</i> <sub>1</sub> / w <i>R</i> <sub>2</sub> (all data)                   | 0.1042 / 0.2263                                                     | 0.1655 / 0.2012                                                     | 0.0382 / 0.0824                                                     |
| Goodness-of-fit on <i>F</i> <sup>2</sup>                                     | 1.011                                                               | 1.010                                                               | 1.024                                                               |
| Extinction coefficient                                                       | —                                                                   | 0.00061(6)                                                          | 0.0029(2)                                                           |
| <i>T</i> <sub>min</sub> / <i>T</i> <sub>max</sub>                            | 0.548 / 0.817                                                       | 0.778 / 0.885                                                       | 0.025 / 0.143                                                       |
| $\Delta\rho_{\max}$ / $\Delta\rho_{\min}$ , e·Å <sup>-3</sup>                | 1.456 / -0.764                                                      | 0.983 / -0.743                                                      | 3.185 / -2.542                                                      |
